# Supplementary material for: Linear maltodextrin polymer–folic acid modified graphene oxide nanoparticles for targeted delivery and pH/photothermal sensitive release of hydrophobic anticancer drugs in tumor cells
Source: Royal Society of Chemistry journal article supplement (doi:10.1039/d2nj03937k), 2022-11-28
Supplement: d2nj03937k1.pdf [file d2nj03937k1.pdf]

## Supplementary Material

### **Linear Maltodextrin Polymer-folic Acid Modified Graphene Oxide Nanoparticles for Targeted Delivery and pH/Photothermal-Sensitive Release of Hydrophobic Anticancer Drug in Tumor Cells**

Xiaoning Li <sup>a</sup>, Huirui zhu <sup>a</sup>, Zihan Xing <sup>a</sup>, Tao Gong<sup>\*a</sup>, Meining Li <sup>a</sup>, Dan Su <sup>a</sup>, Wenting Liang <sup>\*b</sup> and Rui Guo<sup>\*a</sup>

<sup>a</sup>. *Department of biochemistry and Molecular Biology, Shanxi Medical University, Taiyuan 030001, China; gyt830626@163.com (T. G.); [15834151276@139.com](mailto:15834151276@139.com) (R.G.).*

<sup>b</sup>. *Institute of Environmental Science, Department of Chemistry, Shanxi University, Taiyuan 030006, China; [liangwt@sxu.edu.cn](mailto:liangwt@sxu.edu.cn) (W.L.).*

*Xiaoning Li and Huirui Zhu contributed equally to this study.*

**1. Lagergren's pseudo-first-order kinetic model (Equation S1) and Ho's pseudo-second-order model (Equation S2)**

$$\ln(q_e - q_t) = \ln(q_e) - k_1 t \quad (1)$$

$$\frac{t}{q_t} = \frac{1}{k_2 q_e^2} + \frac{t}{q_e} \quad (2)$$

where, in Eq (1) and (2):  $q_e$  ( $\text{mg g}^{-1}$ ) is equilibrium adsorption capacity;  $q_t$  ( $\text{mg g}^{-1}$ ) is the drug loading at different time points;  $t$  (min) is the drug loading time;  $k_1$  and  $k_2$  are kinetic constants.

**2. Langmuir isotherm adsorption model (Equation S3) and Freundlich isotherm adsorption model (Equation S4)**

$$\frac{C_e}{q_e} = \frac{C_e}{q_m} + \frac{1}{q_m K_L} \quad (3)$$

$$\ln q_e = \ln K_f + \frac{1}{n} \ln C_e \quad (4)$$

where, in Eq (3) and (4):  $C_e$  ( $\text{mg L}^{-1}$ ) is the mass concentration at the time of drug loading equilibrium;  $q_m$  ( $\text{mg g}^{-1}$ ) is the drug load in the saturated state;  $q_e$  ( $\text{mg g}^{-1}$ ) is the drug load at equilibrium;  $K_L$  ( $\text{L mg}^{-1}$ ) is the dissociation constant;  $K_f$  is the Freundlich constant;  $1/n$  is the Freundlich component factor.

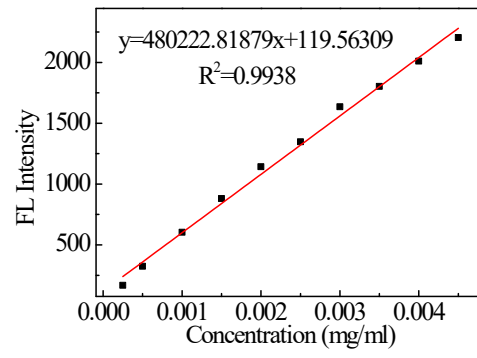

**Figure S1.** Plot of standard curve for DOX solutions with different concentrations.

**Table S1** The pharmacokinetic parameters of DOX on GO@LM-SP-FA.

| Pseudo-first-order model    |                            |                | Pseudo-second-order model   |                                               |                |
|-----------------------------|----------------------------|----------------|-----------------------------|-----------------------------------------------|----------------|
| $q_e$ (mg g <sup>-1</sup> ) | $k_1$ (min <sup>-1</sup> ) | R <sup>2</sup> | $q_e$ (mg g <sup>-1</sup> ) | $k_2$ (g mg <sup>-1</sup> min <sup>-1</sup> ) | R <sup>2</sup> |
| 6.102                       | 0.01093                    | 0.9308         | 39.278                      | 0.00723                                       | 0.9999         |

**Table S2** Related parameters of Langmuir and Freundlich isotherm adsorption models of DOX by GO@LM-SP-FA.

| Langmuir isotherm model      |                              |         | Freundlich isotherm model |                             |        |
|------------------------------|------------------------------|---------|---------------------------|-----------------------------|--------|
| $q_m$ ( $\text{mg g}^{-1}$ ) | $K_L$ ( $\text{L mg}^{-1}$ ) | $R^2$   | $n$                       | $K_f$ ( $\text{L g}^{-1}$ ) | $R^2$  |
| 1789.027                     | 0.101                        | -0.0798 | 0.679                     | 57.016                      | 0.9429 |
